# Supplementary material for: Robust disruptions in electroencephalogram cortical oscillations and large-scale functional networks in autism
Source: Springer Nature journal article supplement (doi:10.1186/s12883-015-0355-8), 2015-06-26
Supplement: MOESM1 [file 9742400]

**SUPPLEMENTARY MATERIAL:**

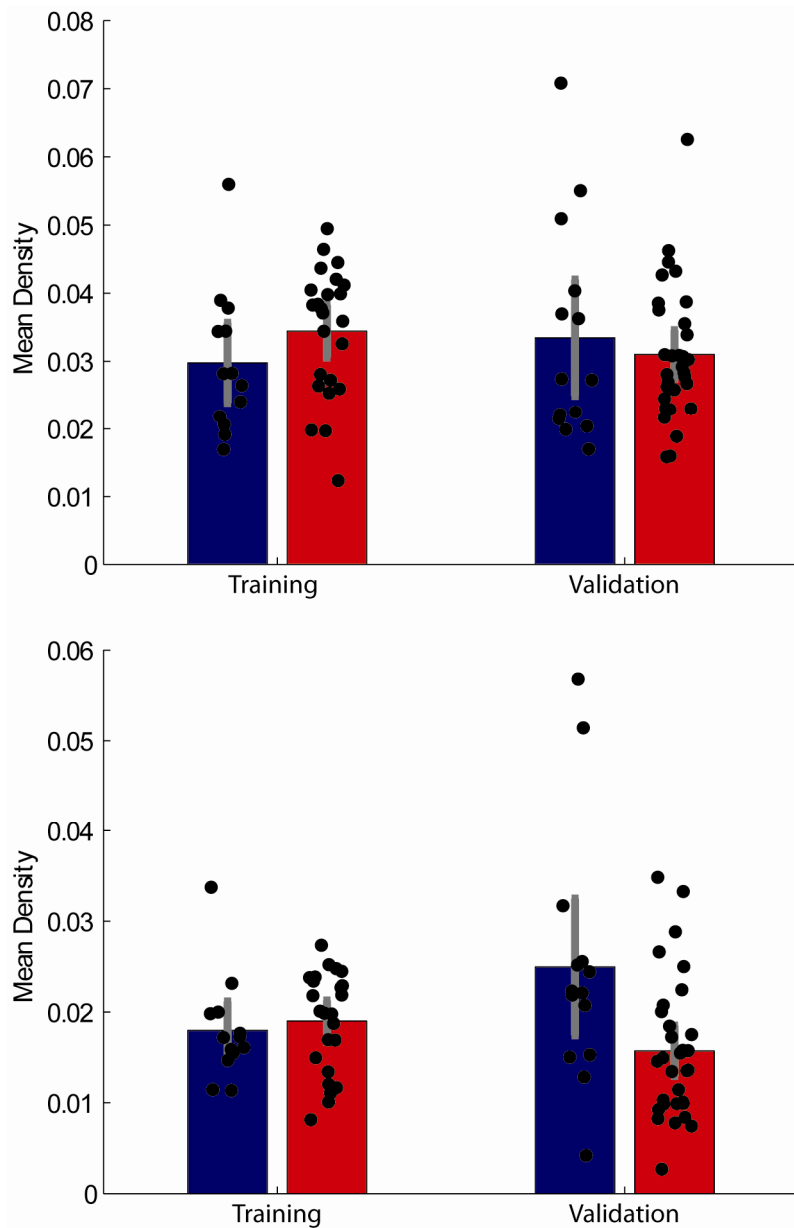

**Supplementary Fig 1. Cross correlation network density using Transverse Bipolar and Hjorth-Laplacian reference montages.** *Cross correlation network density was examined using transverse bipolar (top) and Hjorth-Laplacian (bottom) reference montages as well as longitudinal bipolar for wake and sleep data (wake data shown). The results found were qualitatively similar those found using the longitudinal bipolar (double banana) montage.*
