# Supplementary material for: Robust disruptions in electroencephalogram cortical oscillations and large-scale functional networks in autism
Source: Springer Nature journal article supplement (doi:10.1186/s12883-015-0355-8), 2015-06-26
Supplement: MOESM2 [file 9742400]

### WPLI Analysis

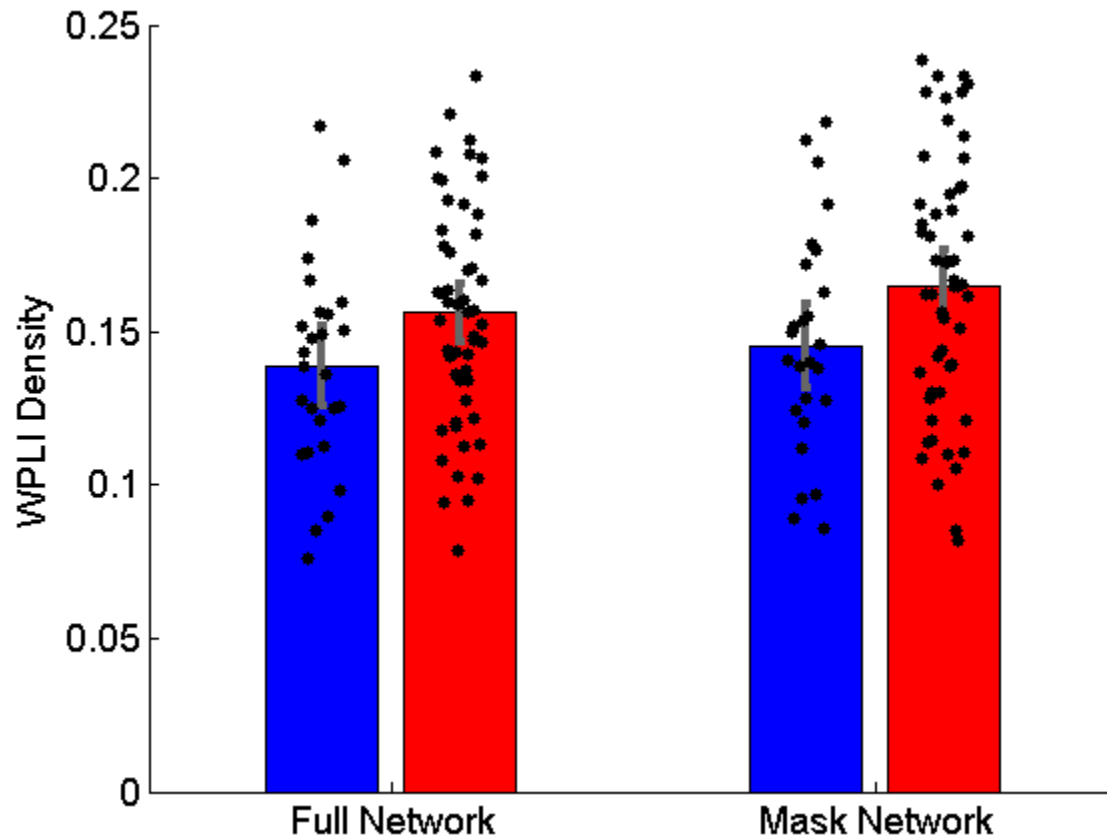

**Supplementary Fig 2. Application of the weighted phase-lag index produces similar density results.** WPLI analysis on the alpha frequency range (8-12 Hz). (Left) Full network density of ASD (blue) and control (red) groups is not significantly different ( $p > 0.1$ ). (Right) Mask density reveals a significant difference ( $p=0.036$ ) between the ASD group (blue) and the control group (red).
